# Supplementary material for: Grapevine Pinot Gris Virus Is Present in Different Non-Vitis Hosts
Source: MDPI journal article supplement (doi:10.3390/plants11141830), 2022-07-12
Supplement: s1 [file s1]

Supporting S1 to

# Grapevine Pinot gris virus is present in different non-*Vitis* hosts

Emese Demian, Nikoletta Jaksa-Czotter and Eva Varallyay\*

\* Correspondence: [varallyay.eva@uni-mate.hu](mailto:varallyay.eva@uni-mate.hu)

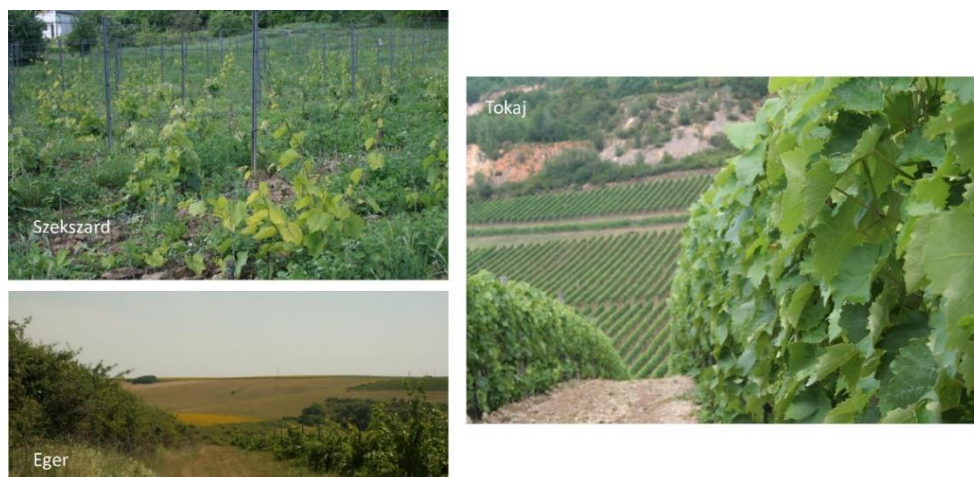

Figure S1. Field view of sampled maintained vineyards at Szekszard, Eger, and Tokaj.

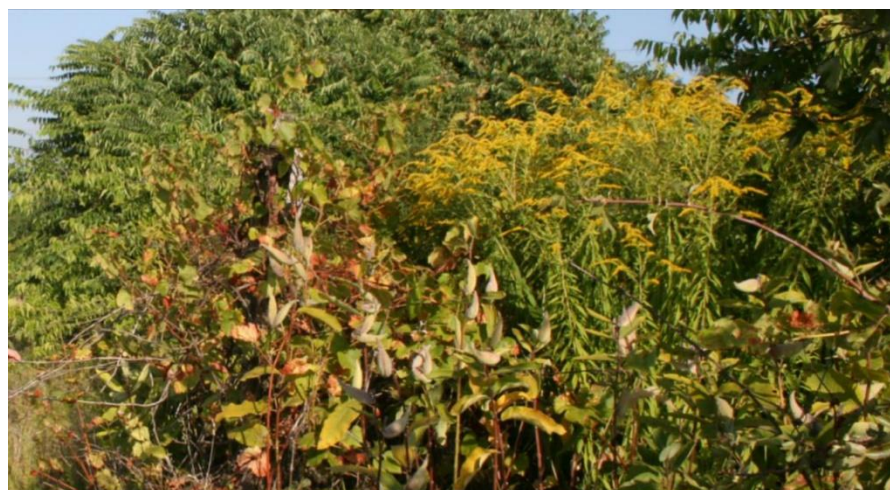

Figure S2: Field view of sampled neglected vineyard at Mogyorod.

*Chenopodium album*

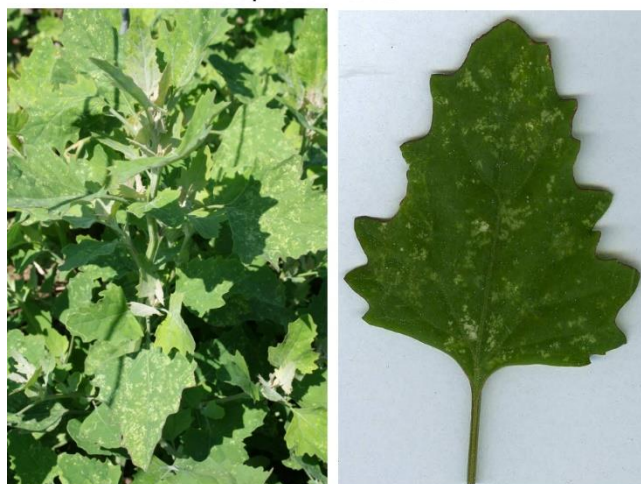

Figure S3: Symptoms of *Chenopodium album* collected at Szekszard that proved to be GPGV infected.

*Asclepias syriaca*

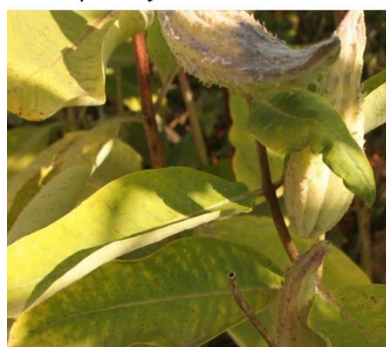

*Ailanthus sp*

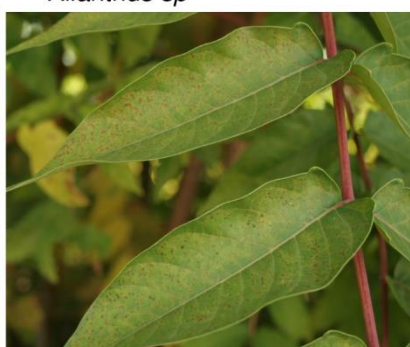

*Rosa canina*

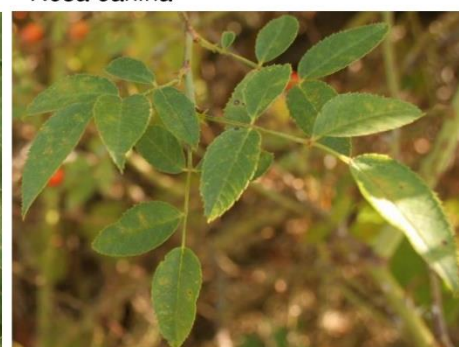

*Crataegus sp*

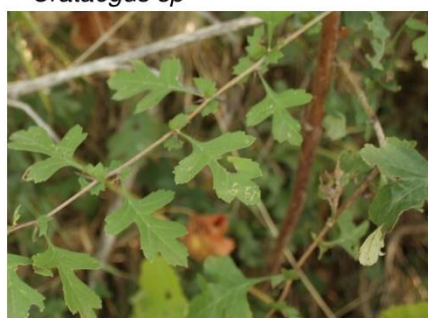

*Sambucus nigra*

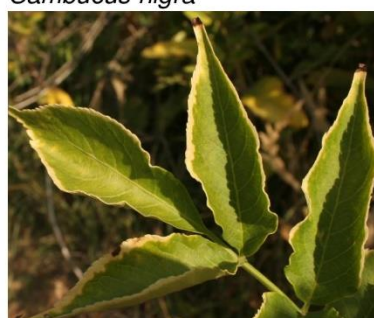

Figure S4: Symptoms of sampled plants collected at Mogyorod that proved to be GPGV infected.



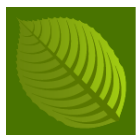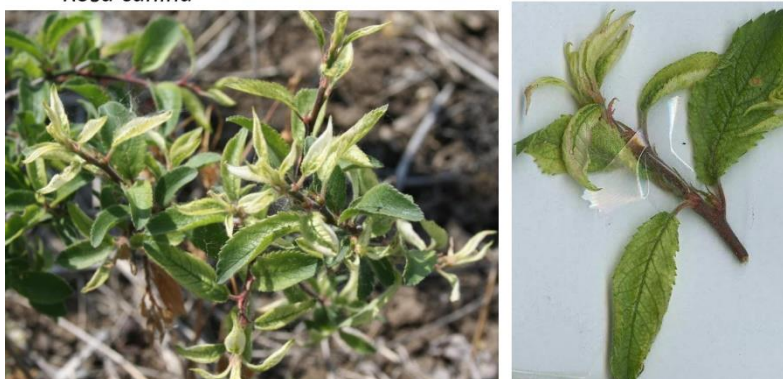

Figure S5: Symptoms of *Rosa canina* collected at Eger that proved to be GPGV infected.

*Rubus sp*

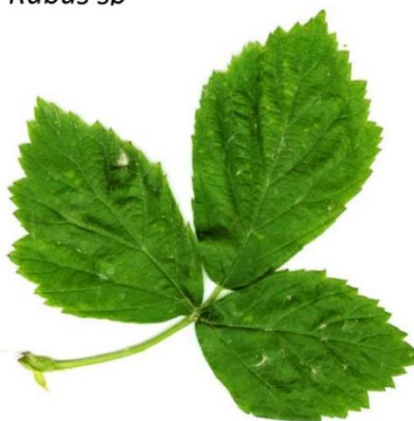

Figure S6: Symptoms of sampled *Rubus sp.* that proved to be GPGV infected.

*Fraxinus sp*

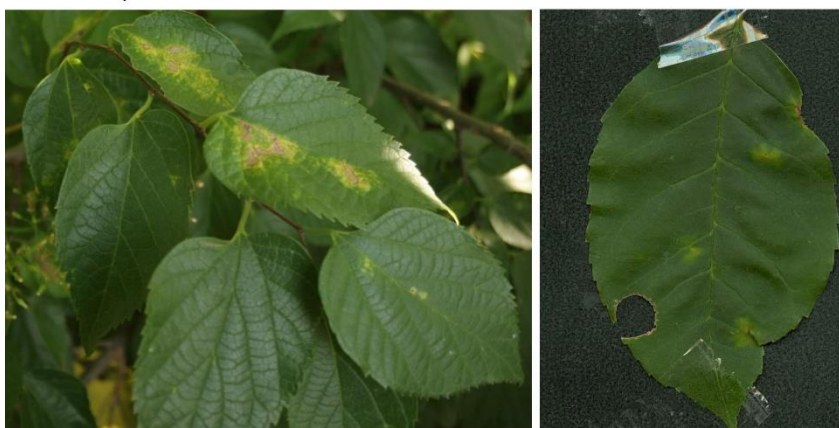

Figure S7: Symptoms of *Fraxinus sp.* collected at Jaszszentlászlo that proved to be GPGV infected.

# MP/CP coding region

- Szekszard
- Mogyorod
- Eger
- Tokaj
- Jaszszentlaszlo

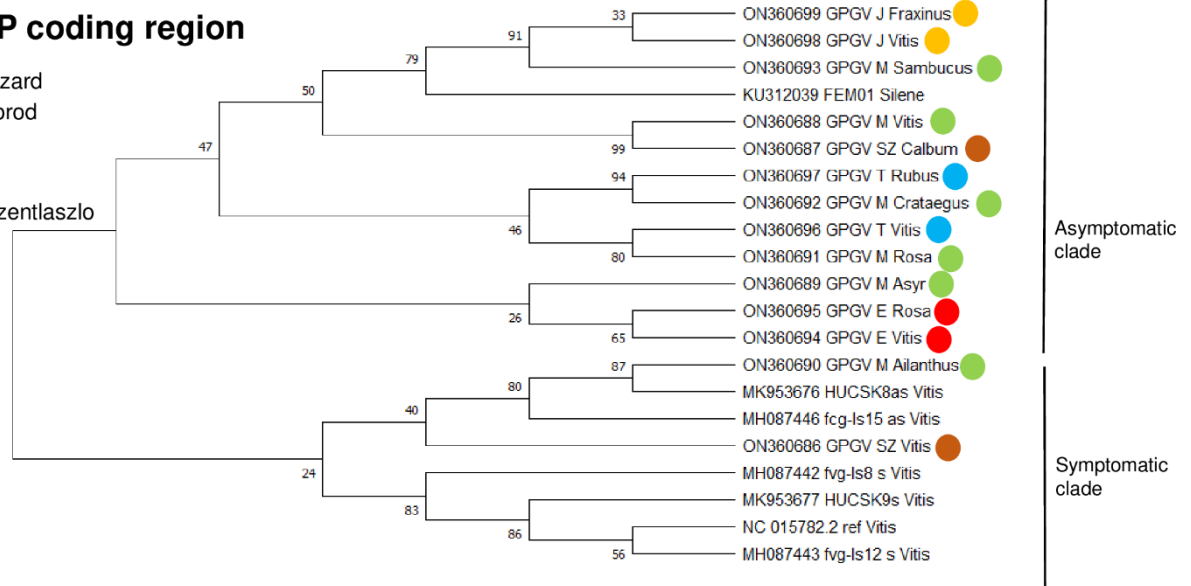

Figure S8. Evolutionary analysis of 411 bp part of MP/CP coding region of GPGV by maximum likelihood method.

The evolutionary history was inferred by using the maximum likelihood method and Tamura-Nei model [1]. The bootstrap consensus tree inferred from 1000 replicates [2] is taken to represent the evolutionary history of the taxa analysed. Branches corresponding to partitions reproduced in less than 50% bootstrap replicates are collapsed. The percentage of replicate trees in which the associated taxa clustered together in the bootstrap test 1000 replicates) are shown next to the branches [2]. Evolutionary analyses were conducted in MEGA11 [3]. Colour circles indicates the geographical origin of the strains. HUCSK8as and HUCSK9s are asymptomatic and symptomatic GPGV strains described in Hungary [4]. Ref is the GPGV reference genome from grapevine, while FEM01 strain was described from *Silene* [5]. Symptomatic (s) and asymptomatic (as) GPGV isolates Fvg-is-8\_s, 12\_s, 15\_as were described by Tarquini et al [6].

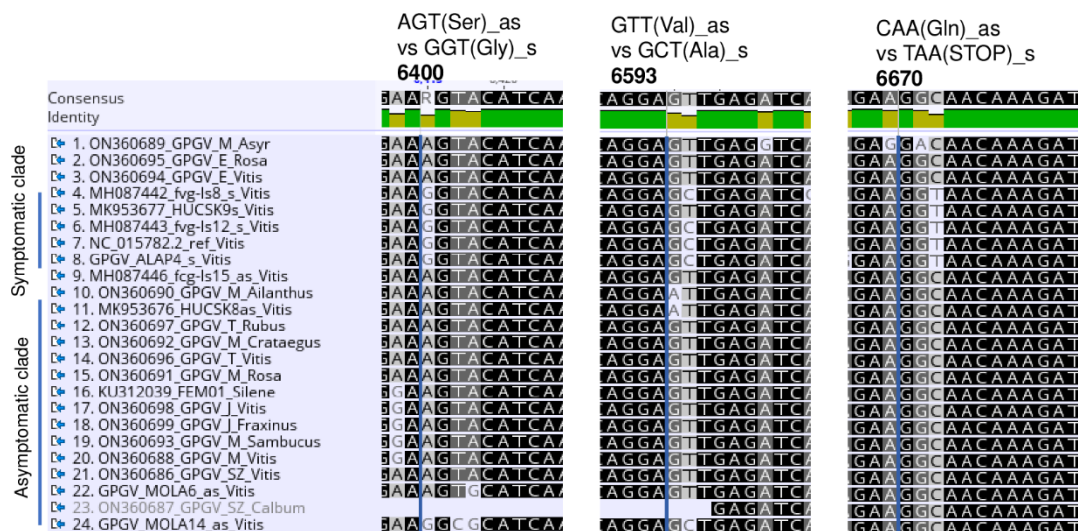

Figure S9: Polymorphism in movement coding region of asymptomatic and symptomatic GPGV variants.

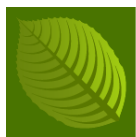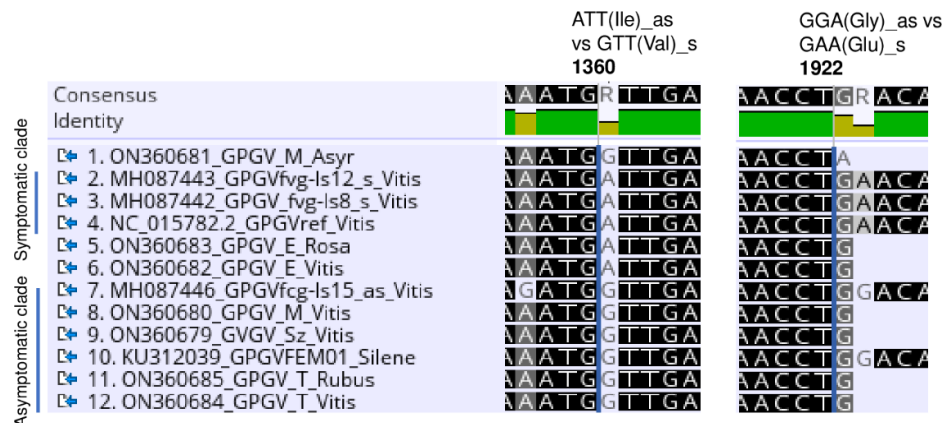

Figure S10: Polymorphism in replicase coding region of asymptomatic and symptomatic GPGV variants.

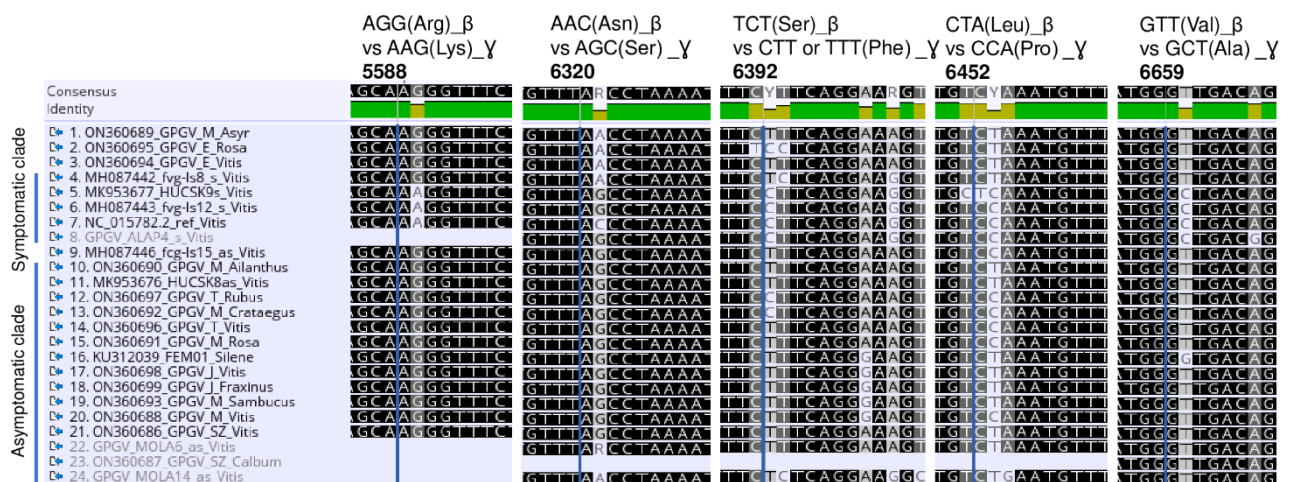

Figure S11: Polymorphism in movement protein coding region of asymptomatic and symptomatic GPGV variants in position differentiating between clade β and γ.

## References:

1. Tamura, K.; Nei, M. Estimation of the number of nucleotide substitutions in the control region of mitochondrial DNA in humans and chimpanzees. *Molecular Biology and Evolution* **1993**, *10*, 512–526.10.1093/oxfordjournals.molbev.a040023
2. Felsenstein, J. Confidence limits on phylogenies: An approach using the bootstrap. *Evolution* **1985**, *39*, 783–791.10.1111/j.1558-5646.1985.tb00420.x
3. Tamura, K.; Stecher, G.; Kumar, S. Mega11: Molecular evolutionary genetics analysis version 11. *Molecular Biology and Evolution* **2021**, *38*, 3022–3027.10.1093/molbev/msab120
4. Demian, E.; Jaksá-Czotter, N.; Molnár, J.; Tusnady, G.E.; Kocsis, L.; Varallyay, E. Grapevine rootstocks can be a source of infection with non-regulated viruses. *European Journal of Plant Pathology* **2020**, *156*, 897–912.10.1007/s10658-020-01942-w
5. Gualandri, V.; Asquini, E.; Bianchedi, P.; Covelli, L.; Brilli, M.; Malossini, U.; Bragagna, P.; Saldarelli, P.; Si-Ammour, A. Identification of herbaceous hosts of the grapevine pinot gris virus (gpgv). *European Journal of Plant Pathology* **2017**, *147*, 21–25.10.1007/s10658-016-0989-4
6. Tarquini, G.; De Amicis, F.; Martini, M.; Ermacora, P.; Loi, N.; Musetti, R.; Bianchi, G.L.; Firrao, G. Analysis of new grapevine pinot gris virus (gpgv) isolates from northeast Italy provides clues to track the evolution of a newly emerging clade. *Archives of Virology* **2019**, *164*, 1655–1660.10.1007/s00705-019-04241-w
