# Supplementary material for: Grapevine Pinot Gris Virus Is Present in Different Non-Vitis Hosts
Source: MDPI journal article supplement (doi:10.3390/plants11141830), 2022-07-12
Supplement: s1 [file s1]

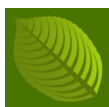

# Grapevine Pinot gris virus is present in different non-*Vitis* hosts

Emese Demian, Nikolett Jaksz-Czotter and Eva Varallyay\*

\* [Correspondence: varallyay.eva@uni-mate.hu](mailto:varallyay.eva@uni-mate.hu)

Table S1

Sequences of the used of PCR primers for virus detection with their appropriate references

| Primer Name     | Primer Sequence (5'-3')      | amplified product   | annealing temperature | Position on the reference genome | Funcion of the amplified region | Genome used as a reference | Reference*           |
|-----------------|------------------------------|---------------------|-----------------------|----------------------------------|---------------------------------|----------------------------|----------------------|
| GPG-6609F       | GAGATCAACAGTCAGGAGAG         | 411                 | 62                    | 6610-6629                        | coat protein                    | KU312039                   | Glasa et al., 2014   |
| GPG-7020R       | GACTTCTGGTGCCTTATCAC         |                     |                       | 7021-7002                        |                                 |                            |                      |
| GPGV 5557F      | ACTTATCTGATGGCTCTGATG        | 1652                | 62                    | 5569-5589                        | RdRP-MP-CP-3'UTR                |                            | Czotter et al., 2018 |
| GPGV 7220R      | GTTACGTGCTCCTATGAGAC         |                     |                       | 7221-7202                        |                                 |                            |                      |
| GPGV-10F        | CAATTGATCCCGTGTAGTGC         | 2004                | 62                    | 21-40                            | 5'UTR-RdRP                      |                            | this work            |
| GPGV-2015R      | CAGGTTCATYTTTGGATTCAAC       |                     |                       | 2025-2004                        |                                 |                            |                      |
| GPGV5578_F_KpnI | caggtaccATGGCTCTGATGAAGAGGAT | 1600                | 64                    | 5578-5597                        | RdRP-MP-CP-3'UTR                |                            |                      |
| GPGV7177_R_XbaI | tctagaCTACATACTRAATGCACTCTCC |                     |                       | 7178-7156                        |                                 |                            |                      |
| GPG-526A2       | GGATGGATGTATCTCCTGAG         | only for sequencing |                       | 517-536                          |                                 |                            |                      |

Cycling parameters during RT-PCR reaction using NEB Q5 DNA polymerase:

|                       |       |     |
|-----------------------|-------|-----|
| 98°C                  | 30 s  | 40x |
| 98°C                  | 10 s  |     |
| annealing temperature | 20 s  |     |
| 72°C                  | 60 s  |     |
| 72°C                  | 2 min |     |

**References:**

**Glasa M**, Predaja L, Komnek P, Nagyov A, Candresse T, Olmos A (2014) Molecular characterization of divergent Grapevine Pinot Gris Virus isolates and their detection in Slovak and Czech grapevines. Arch Virol 159(8):2103–2107. <https://doi.org/10.1007/s00705-014-2031-5>

**Czotter N**, Molnar J, Szabó E, Demian E, Kontra L, Baksa I, Szittyá G, Kocsis L, Deak T, Bisztray G, Tusnady GE, Burgyan J and Varallyay E (2018) NGS of Virus-Derived Small RNAs as a Diagnostic Method Used to Determine Viromes of Hungarian Vineyards. Front. Microbiol. 9:122. doi:
